# Supplementary material for: Insights into characteristics and formation mechanisms of secondary organic aerosols in the Guangzhou urban area
Source: Copernicus journal article supplement (doi:10.5194/acp-23-5119-2023), 2023-05-05
Supplement: Supplementary file 1 [file acp-23-5119-2023-supplement.pdf]

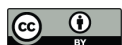

*Supplement of*

## **Insights into characteristics and formation mechanisms of secondary organic aerosols in the Guangzhou urban area**

**Miaomiao Zhai et al.**

*Correspondence to:* Ye Kuang ([kuangye@jnu.edu.cn](mailto:kuangye@jnu.edu.cn)) and Li Liu ([liul@gd121.cn](mailto:liul@gd121.cn))

The copyright of individual parts of the supplement might differ from the article licence.

34 **1. Aerosol liquid water concentration calculation**

35 The size resolved aerosol liquid water content (ALWC) was formulated as the  
36 following in which the ALWC was the summation of aerosol water contributed by  
37 inorganic aerosols and organic aerosols:

38 
$$ALWC = ALWC_{Inorg} + ALWC_{LOOA} + ALWC_{MOOA}$$

39 Where the  $ALWC_{Inorg}$  was calculated using the ISORROPIA (Kuang et al., 2018) model  
40 using reverse mode and metastable with size resolved inorganic aerosol chemical  
41 compositions measured by the Q-ACSM as inputs. The SOA factors LOOA and MOOA  
42 are treated as hydrophilic components whereas POA factors HOA and COA are treated  
43 as hydrophobic components as discussed in Liu et al. (2022). Using the derived  $\kappa_{LOOA}$   
44 and  $\kappa_{MOOA}$  of 0.13 and 0.23 in Liu et al. (2022) due to their similar O/C values,  
45  $ALWC_{LOOA}$  and  $ALWC_{MOOA}$  was calculated as the following by assuming densities of  
46 LOOA and MOOA as 1.2 and 1.4 g/cm<sup>3</sup> following Liu et al. (2022):

47 
$$ALWC_{SOA} = \frac{m_{SOA}}{\rho_{SOA}} \times \rho_w \times \frac{\kappa_{SOA}}{\left(\frac{100\%}{RH} - 1\right)}$$

48 The  $m_{SOA}$  is the mass concentrations of SOA factors.

49  
50  
51  
52  
53  
54  
55  
56  
57  
58  
59  
60  
61  
62  
63

64 2. Supplement Figures for Source Apportionments

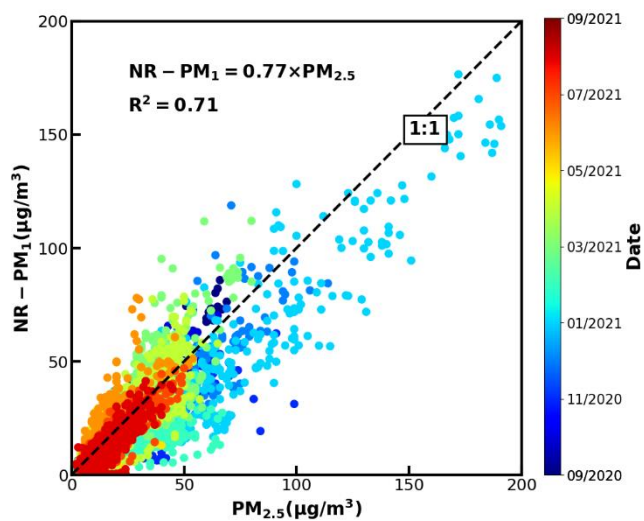

Figure S1. Correlation between NR-PM<sub>1</sub> and PM<sub>2.5</sub> for the entire year.

65  
66

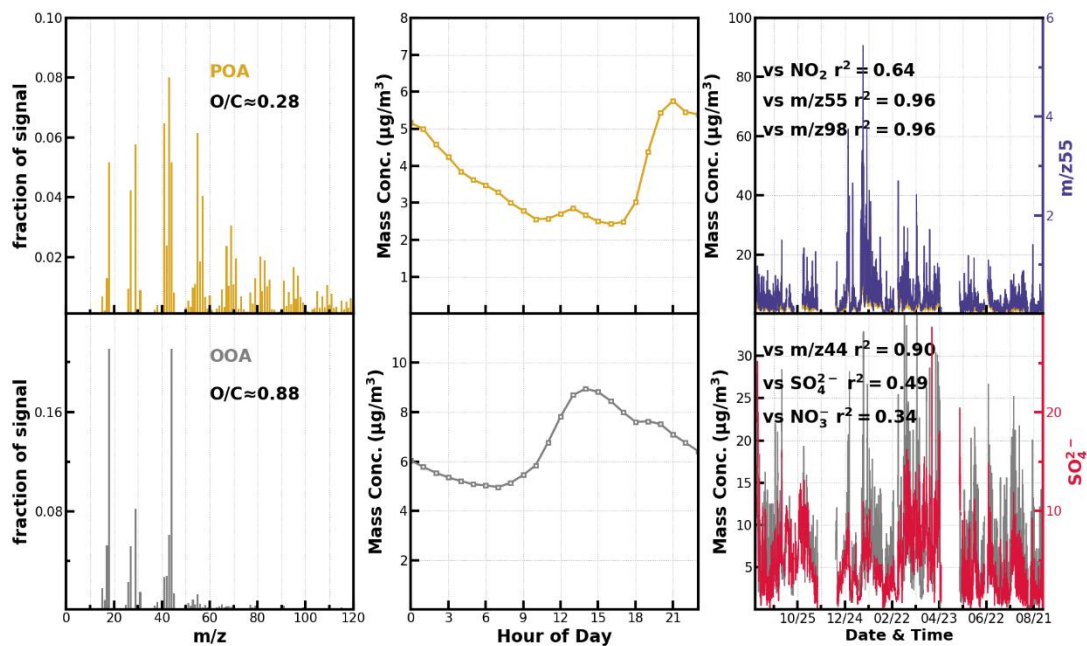

Figure S2. Results from the 2-factor solution of PMF-ACSM for the entire dataset.

67  
68  
69  
70  
71  
72

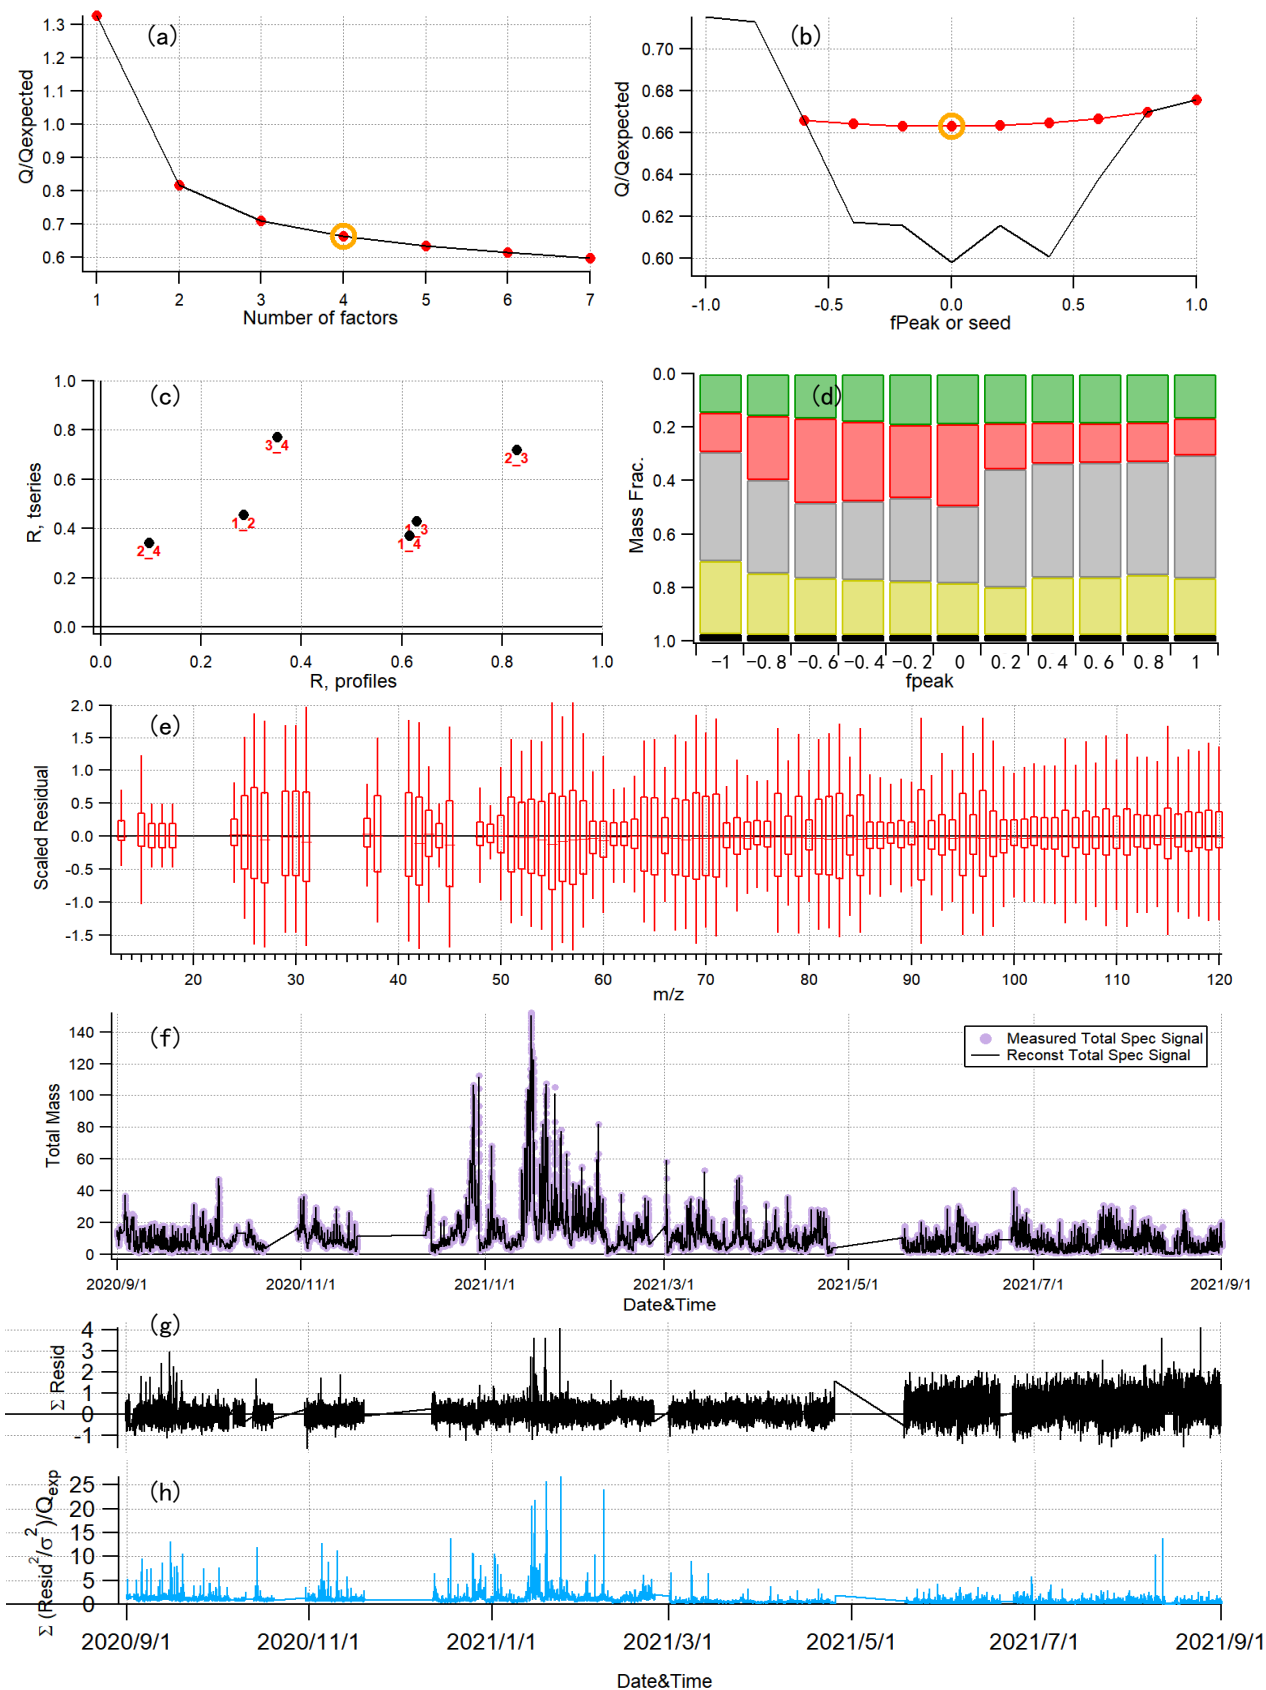

**Figure S3.** Diagnostic plots of the 4-factor solution in the unconstrained PMF for the entire dataset.

73

74

75

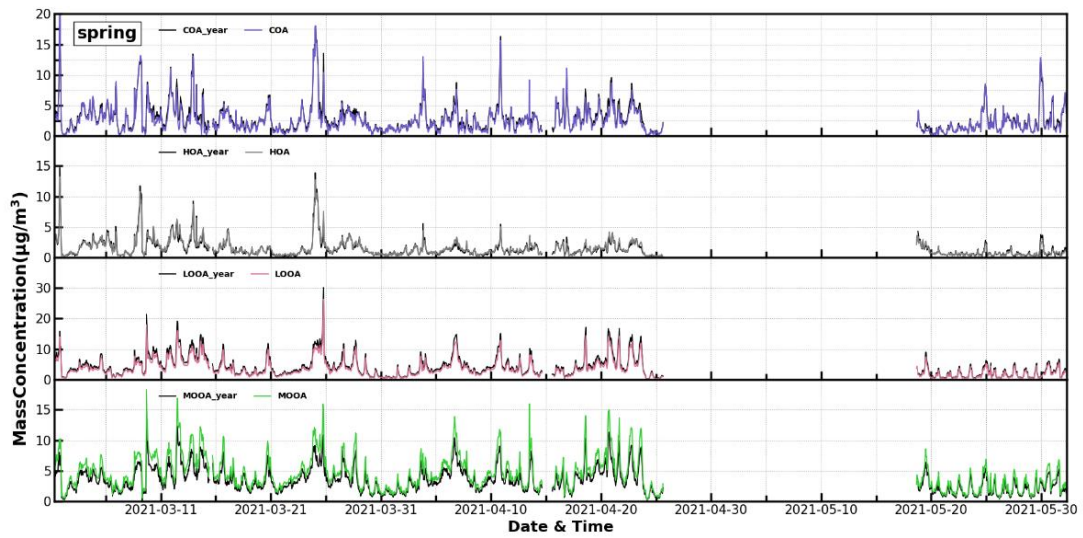

Figure S4. Comparison of time series of ME2-ACSM for the entire dataset in spring and spring dataset.

76

77

78

79

80

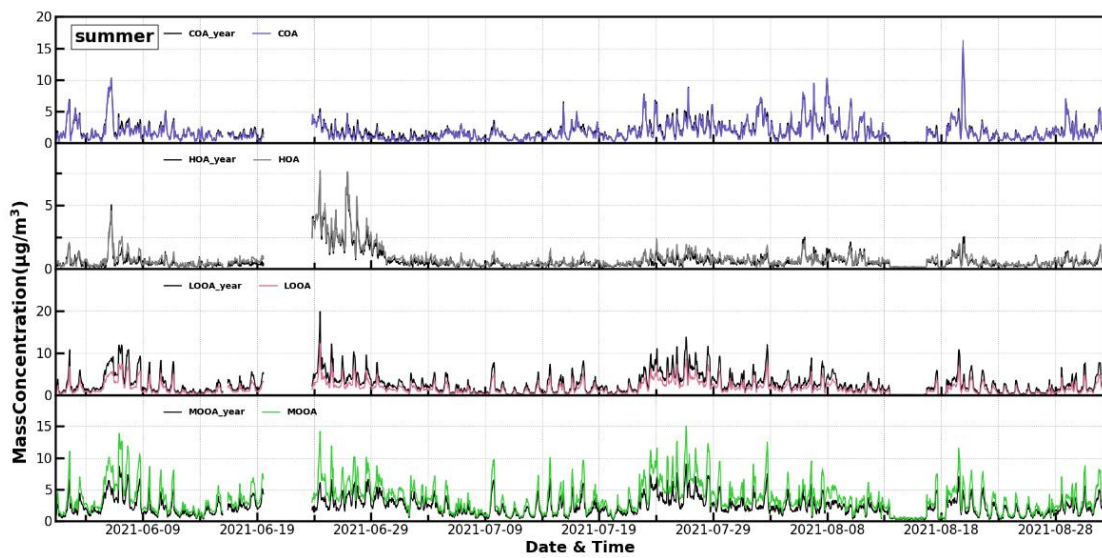

Figure S5. Comparison of time series of ME2-ACSM for the entire dataset in summer and summer dataset.

81

82

83

84

85

86

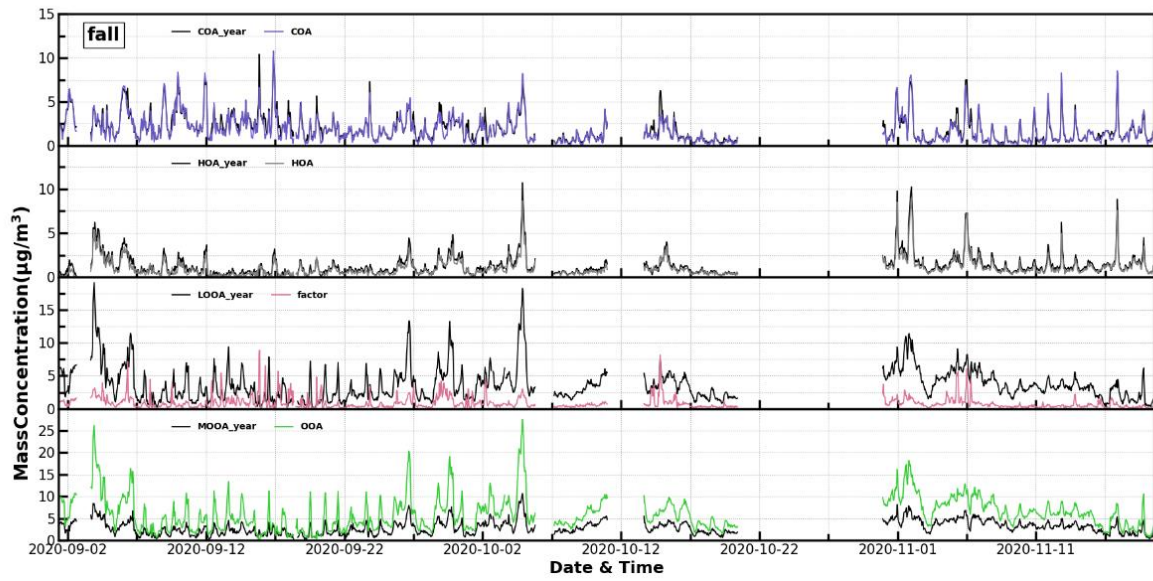

Figure S6. Comparison of time series of ME2-ACSM for the entire dataset in fall and fall dataset.

87

88

89

90

91

92

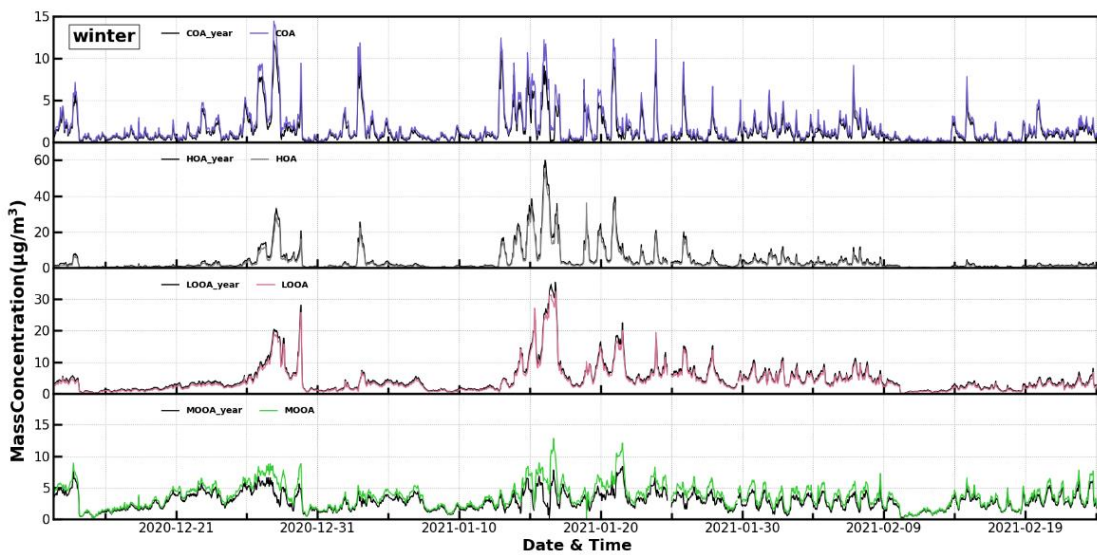

Figure S7. Comparison of time series of ME2-ACSM for the entire dataset in winter and winter dataset.

93

94

95  
96  
97  
98  
99  
100  
101  
102  
103  
104  
105  
106  
107

### 3. Other supplementary figures

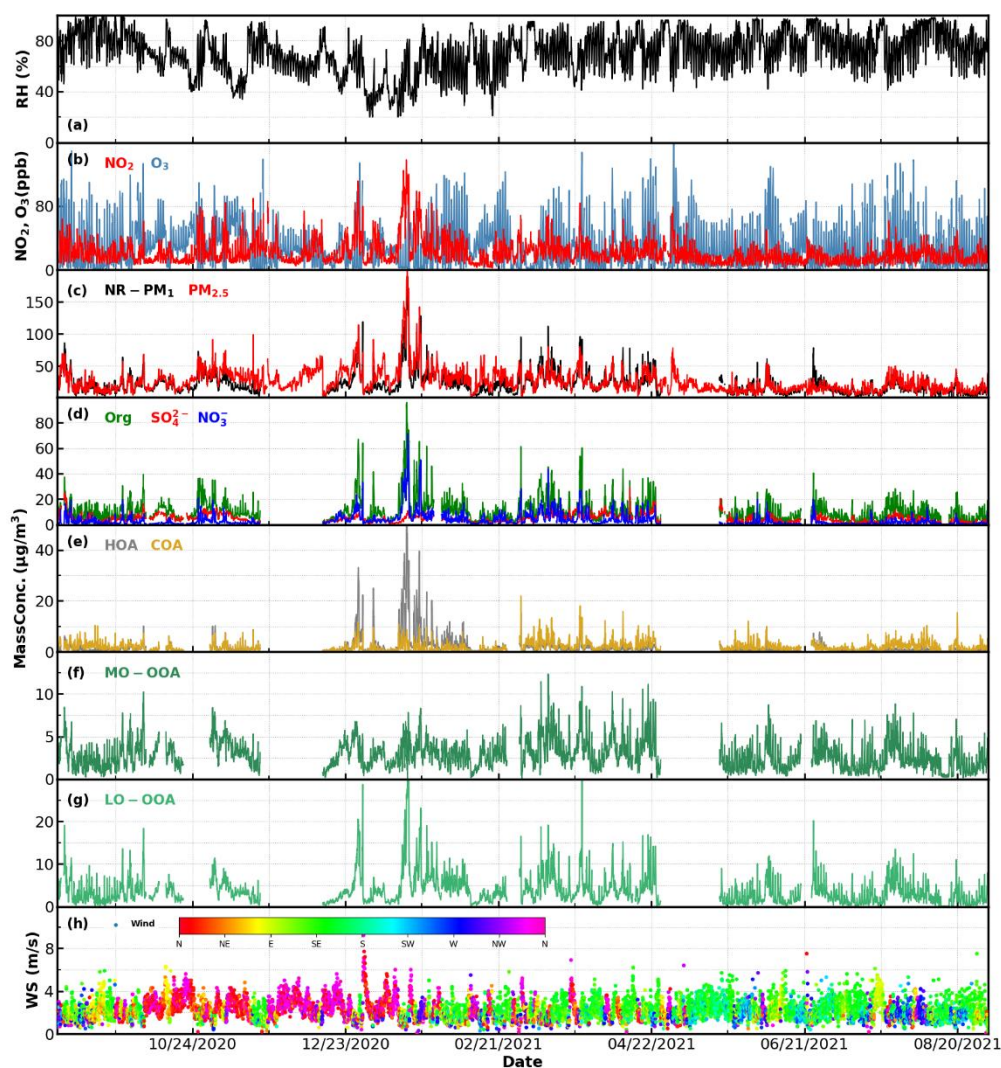

Figure S8. Time series of (a) RH; (b) NO<sub>2</sub> and O<sub>3</sub>; hourly average mass concentrations of (c) NR-PM<sub>1</sub> and PM<sub>2.5</sub>; (d) Organics (Org), sulfate (SO<sub>4</sub><sup>2-</sup>) and nitrate (NO<sub>3</sub><sup>-</sup>) and (e-g) four factors from the ME2-ACSM analysis for the entire year, including HOA, COA, MO-OOA and LO-OOA and (h) wind speed (WS) and wind direction (WD).

108

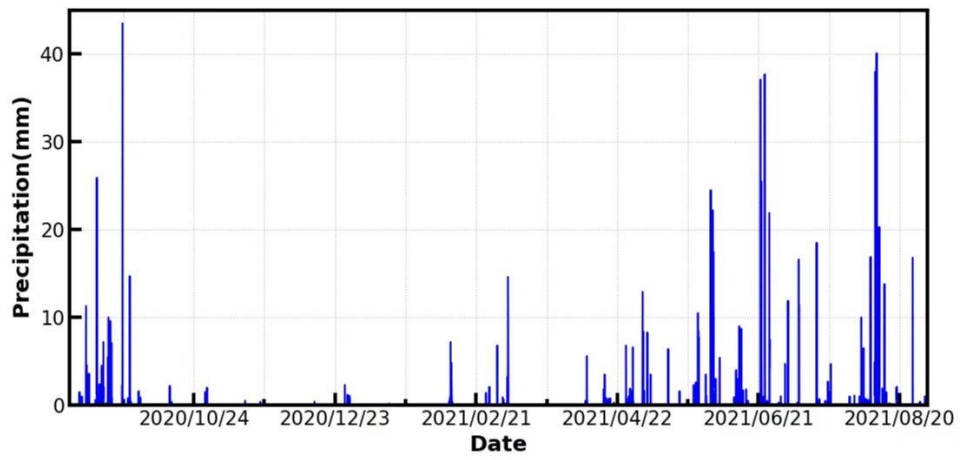

Figure S9. Time series of precipitation during the observations

110  
 111  
 112  
 113  
 114  
 115  
 116  
 117

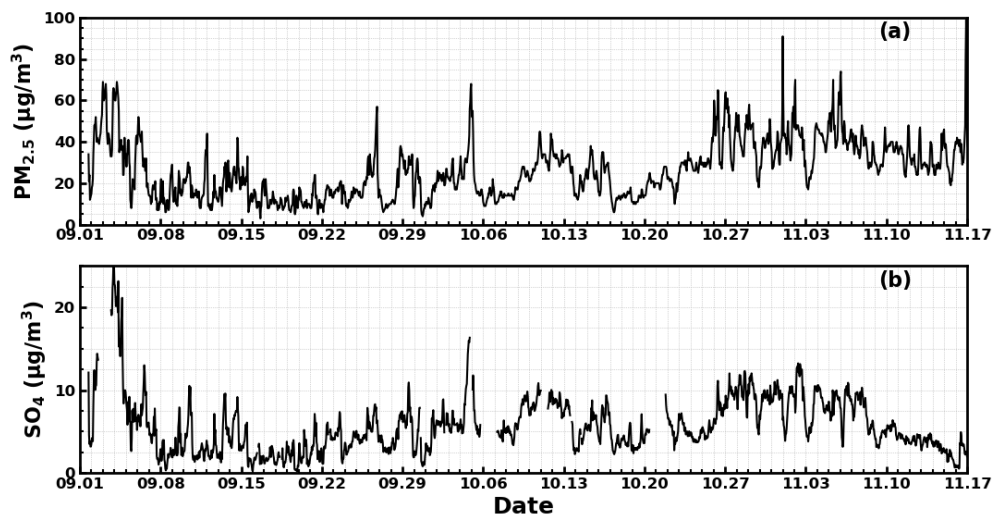

Figure S10. Time series of PM<sub>2.5</sub> (a) and sulfate (SO<sub>4</sub>) (b) during autumn of 2020.

118  
 119  
 120



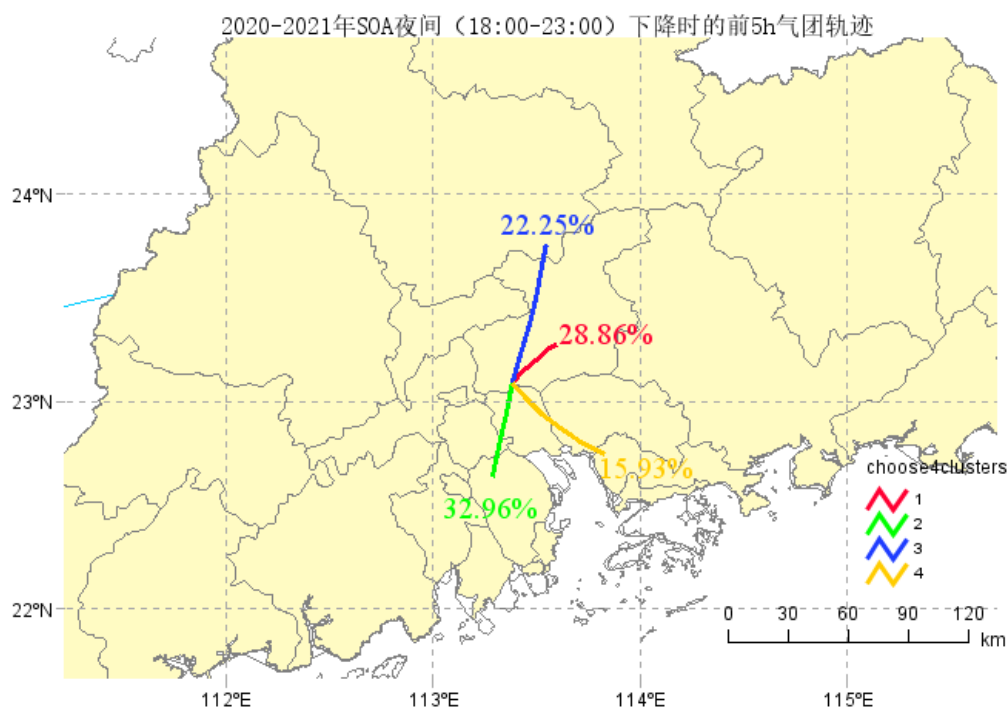

**Figure S11.** The 5h back trajectories of airflow when SOA decreased at nighttime from 18:00 to 23:00 LT in 2020-2021.

122

123

124

125

126

127

128

129 Kuang, Y., Zhao, C. S., Zhao, G., Tao, J. C., Xu, W., Ma, N., and Bian, Y. X.: A novel method for  
 130 calculating ambient aerosol liquid water content based on measurements of a humidified  
 131 nephelometer system, *Atmospheric Measurement Techniques*, 11, 2967-2982, 10.5194/amt-11-  
 132 2967-2018, 2018.

133 Liu, L., Kuang, Y., Zhai, M., Xue, B., He, Y., Tao, J., Luo, B., Xu, W., Tao, J., Yin, C., Li, F., Xu, H., Deng,  
 134 T., Deng, X., Tan, H., and Shao, M.: Strong light scattering of highly oxygenated organic aerosols  
 135 impacts significantly on visibility degradation, *Atmos. Chem. Phys.*, 22, 7713-7726, 10.5194/acp-  
 136 22-7713-2022, 2022.

137
